# Supplementary material for: A novel nutritional induction strategy flexibly switching the biosynthesis of food-like products from methane by a methanotrophic bacterium
Source: Royal Society of Chemistry journal article supplement (doi:10.1039/d3gc04674e), 2024-01-01
Supplement: d3gc04674e1.pdf [file d3gc04674e1.pdf]

## Electronic Supplementary Material (ESI) for Green Chemistry

### A novel nutritional induction strategy flexibly switching biosynthesis of food-like products from methane by a methanotrophic bacterium

Zixi Gao <sup>‡a</sup>, Shuqi Guo <sup>‡a</sup>, Yunhao Chen <sup>‡b</sup>, Hansen Chen <sup>c</sup>, Rongzhan Fu <sup>d</sup>, Qiaoqiao Song <sup>a</sup>, Shen Li <sup>a</sup>, Wenyong Lou <sup>c</sup>, Daidi Fan <sup>d</sup>, Yin Li <sup>e</sup>, Shihui Yang <sup>\*b</sup>, Ramon Gonzalez <sup>\*f</sup>, Qiang Fei <sup>\*a</sup>

<sup>a</sup>Xi'an Key Laboratory of C1 Compound Bioconversion Technology, School of Chemical Engineering and Technology, Xi'an Jiaotong University, Xi'an 710049

<sup>b</sup>State Key Laboratory of Biocatalysis and Enzyme Engineering, School of Life Sciences, Hubei University, Wuhan 430062, China

<sup>c</sup>Lab of Applied Biocatalysis, School of Food Science and Engineering, South China University of Technology, Guangzhou 510641, China

<sup>d</sup>Shaanxi Key Laboratory of Degradable Biomedical Materials, School of Chemical Engineering, Northwest University, Xi'an 710069, China

<sup>e</sup>CAS Key Laboratory of Microbial Physiological and Metabolic Engineering, State Key Laboratory of Microbial Resources, Institute of Microbiology, Chinese Academy of Sciences, Beijing, 100101, China

<sup>f</sup>Department of Chemical, Biological, and Materials Engineering, University of South Florida, Tampa, FL, USA

\*Corresponding author:

Shihui Yang, E-mail: [shihui.yang@hubu.edu.cn](mailto:shihui.yang@hubu.edu.cn)

Ramon Gonzalez, E-mail: [ramongonzale@usf.edu](mailto:ramongonzale@usf.edu)

Qiang Fei, E-mail: [feiqiang@xjtu.edu.cn](mailto:feiqiang@xjtu.edu.cn)

‡ These authors contributed equally to this work.

### **Figure captions**

**Fig. S1** Comparison of process parameters and synthesis of cell protein and carbohydrates by *M. buryatense* 5GB1 in scenario I and scenario II.

**Fig. S2** Characterized methane-derived carbohydrates (glycogen and extracellular polysaccharides) produced by *M. buryatense* 5GB1.

**Fig. S3** Identification of differentially expressed genes (DEGs) of *M. buryatense* 5GB1 in scenario III versus scenario II.

**Fig. S4** Schematic of *M. buryatense* 5GB1 cultures in three different scenarios.

### **Table captions**

**Table S1** Cell protein production by methanotrophic bacteria using CH<sub>4</sub> as the sole substrate.

**Table S2** Influence of growth rate on cell protein production performance in scenario III.

**Table S3** Elemental composition of cell protein produced in scenario III.

**Table S4** Transcriptomic response to induction of oxygen deficiency.

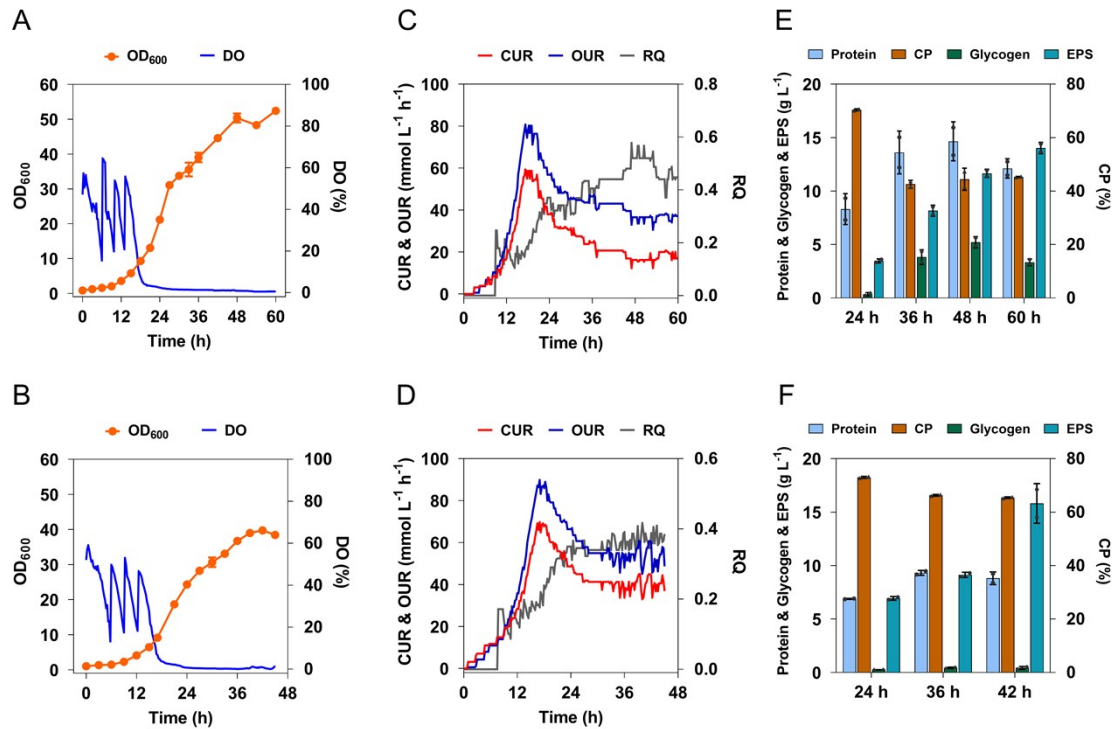

**Fig. S1** Comparison of process parameters and synthesis of cell protein and carbohydrates by *M. buryatense* 5GB1 in scenario I and scenario II. (A and B) Time course of cell growth ( $OD_{600}$ ) and dissolved oxygen (DO) concentration in scenario I (A) and scenario II (B) of *M. buryatense* 5GB1, respectively. (C and D) Time course of methane ( $CH_4$ ) and oxygen ( $O_2$ ) uptake rate, and respiratory quotient (RQ) in scenario I (C) and scenario II (D) of *M. buryatense* 5GB1, respectively. (E and F) Time course of cell protein, glycogen, and extracellular polysaccharides (EPS) titer and crude protein (CP) content in scenario I (E) and scenario II (F) of *M. buryatense* 5GB1, respectively. Scenario I and scenario II were terminated at 60 and 45 h, respectively, due to cessation of growth and uncontrollable foaming.

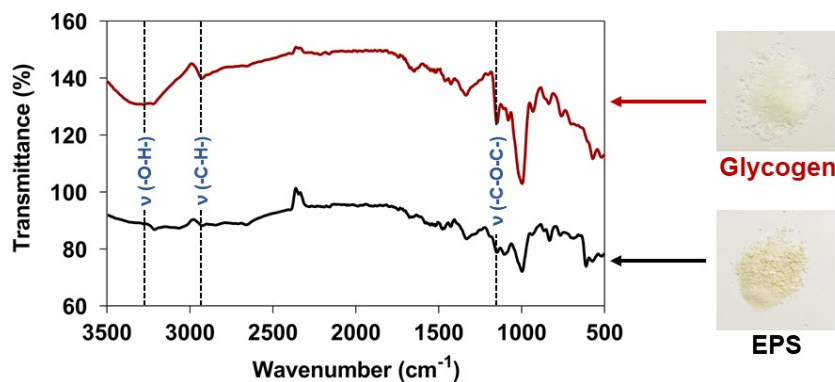

**Fig. S2** Characterized methane-derived carbohydrates (glycogen and extracellular polysaccharides (EPS)) produced by *M. buryatense* 5GB1. Samples of glycogen and EPS were analyzed by a Fourier-transform infrared spectroscopy. Typical spectrum assignments from 3300-1000  $\text{cm}^{-1}$ , where  $\nu$  = stretching vibrations. The intense band at about 3270  $\text{cm}^{-1}$  and the weak absorption band at approximately 2930  $\text{cm}^{-1}$  were the correlative characteristic peaks of O-H and C-H stretching vibrations in the sugar ring, respectively. The absorption of 1150  $\text{cm}^{-1}$  was caused by C-O stretching vibration, indicating the presence of a cyclic C-O-C structure.

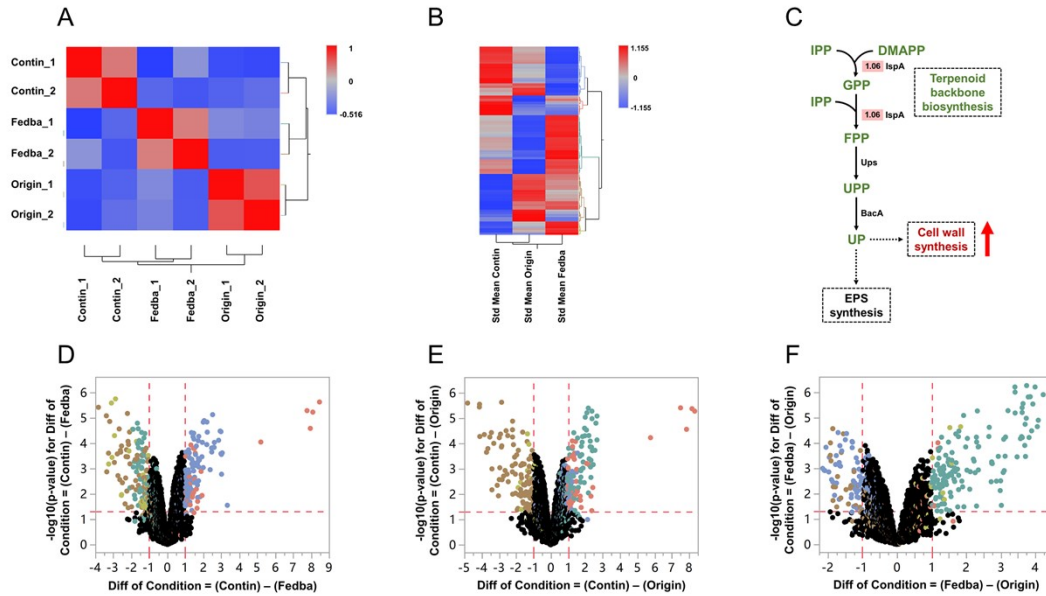

**Fig. S3** Identification of differentially expressed genes (DEGs) of *M. buryatense* 5GB1 in scenario III versus scenario II. (A) Repeatability analysis for biological replicates between RNA-sequence samples. (B) Hierarchical clustering performed using the least-squares means of DEGs. (C) DEG involved in the terpenoid backbone synthesis. Full-names of the enzymes are as below. IspA, farnesyl diphosphate synthase. Ups, undecaprenyl diphosphate synthase. BacA, undecaprenyl-diphosphatase. Full-names of the compounds are as below. IPP, isopentenyl diphosphate. DMAPP, dimethylallyl diphosphate. GPP, geranyl diphosphate. FPP, farnesyl diphosphate. UPP, undecaprenyl diphosphate. UP, undecaprenyl phosphate. EPS, exopolysaccharides. (D-F) Volcano maps of DEGs ( $\log_2(\text{fold change}) \geq 1$  and  $\leq -1$  regarded as significantly up- and down-regulated respectively,  $P\text{-value} \leq 0.05$  for both). In (D), pairwise comparison of scenario III (Contin, sampled at the steady state under dilution rate  $0.07 \text{ h}^{-1}$ ) relative to scenario II (Fedba, sampled at 32 h) was performed ( $n=2$ ). In (E), pairwise comparison of scenario III relative to the late exponential phase (Origin, sampled at 21 h) was performed ( $n=2$ ). In (F), pairwise comparison of scenario II relative to the late exponential phase was performed ( $n=2$ ).

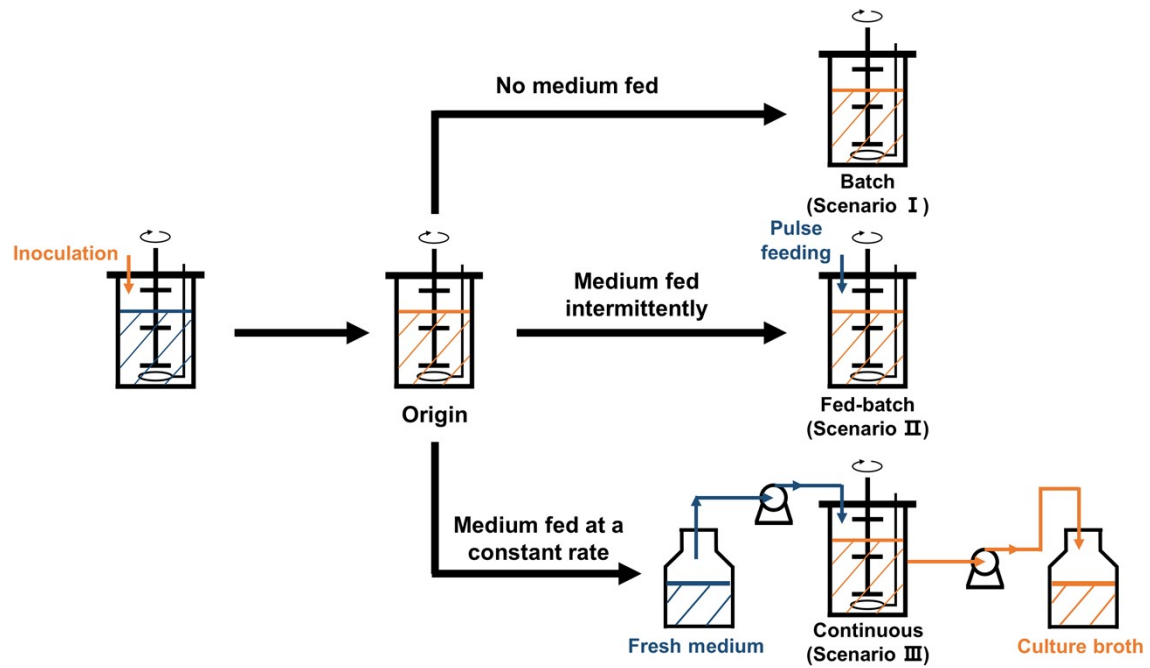

**Fig. S4** Schematic of *M. buryatense* 5GB1 cultures in the three different scenarios. A gas mixture containing methane and air was sparged into the fermenter at a fixed flow rate throughout cultures. After inoculation, cell growth went through an exponential phase after adapting to the new environment, named “Origin” in this study. Nutrients were all sufficient in the “Origin” period. No additional medium was fed during scenario I, while a concentrated medium was fed at several pulses in the scenario II to maintain residual nitrate concentration. In scenario III, fresh medium modified based on the initial medium as well as culture broth was pumped in and out of the fermenter by peristaltic pumps at a constant rate equal to the growth rate multiplied by working volume.

**Table S1** Cell protein production by methanotrophic bacteria using CH<sub>4</sub> as the sole substrate.

| Strain                                     | Culture type                                    | Titer<br>(g L <sup>-1</sup> ) | Productivity<br>(mg L <sup>-1</sup> h <sup>-1</sup> ) | Content<br>(%) | Reference                  |
|--------------------------------------------|-------------------------------------------------|-------------------------------|-------------------------------------------------------|----------------|----------------------------|
| <i>Methylosinus trichosporium</i> OB3b     | Batch                                           | 14.00                         | 58.33                                                 | n.a.           | Han et al. 2009 (1)        |
| <i>Methylovimicrobium alcaliphilum</i> 20Z | Batch                                           | 3.00                          | 31.25                                                 | n.a.           | Cho et al. 2020 (2)        |
| <i>Methylomonas rapida</i> MP1T            | Continuous<br>( $\mu=0.218$ h <sup>-1</sup> )   | 3.26                          | 710.68                                                | 69.55          | Tikhonova et al., 2023 (3) |
| <i>Methylovimicrobium buryatense</i> 5GB1  | Batch                                           | 14.80                         | 308.33                                                | n.a.           | Hu et al. 2020 (4)         |
| <i>M. buryatense</i> 5GB1                  | Scenario I                                      | 14.65                         | 305.21                                                | 44.42          | This study                 |
| <i>M. buryatense</i> 5GB1                  | Scenario II                                     | 9.32                          | 258.89                                                | 66.28          | This study                 |
| <i>M. buryatense</i> 5GB1                  | Scenario III<br>( $\mu=0.102$ h <sup>-1</sup> ) | 6.28                          | 640.05                                                | 71.60          | This study                 |

**Note:**  $\mu$ , growth rate; **n.a.**: not applicable.

**Table S2** Influence of growth rate on cell protein production performance in scenario III.

| $\mu$ (h <sup>-1</sup> )                                       | 0.050  | 0.063  | 0.076  | 0.089  | 0.102  |
|----------------------------------------------------------------|--------|--------|--------|--------|--------|
| CP content (% w/w)                                             | 66.77  | 68.09  | 68.11  | 69.06  | 71.60  |
| $Y_{X/S}$ (g g <sup>-1</sup> CH <sub>4</sub> )                 | 0.82   | 0.78   | 0.77   | 0.78   | 0.68   |
| $q_{O_2}$ (mmol g <sup>-1</sup> DCW h <sup>-1</sup> )          | 6.22   | 7.71   | 9.46   | 10.83  | 13.29  |
| O <sub>2</sub> /CH <sub>4</sub> uptake rate                    | 1.64   | 1.53   | 1.53   | 1.51   | 1.42   |
| Residual NO <sub>3</sub> <sup>-</sup> -N (mg L <sup>-1</sup> ) | 7.85   | 102.43 | 143.02 | 186.25 | 196.40 |
| Supernatant TN (mg L <sup>-1</sup> )                           | 189.21 | 249.14 | 247.04 | 288.16 | 295.31 |
| EPS yield (g g <sup>-1</sup> protein)                          | 0.59   | 0.60   | 0.82   | 1.26   | 1.33   |

**Note:**  $\mu$ , growth rate. CP, crude protein.  $Y_{X/S}$ , cell protein yield on methane (CH<sub>4</sub>).  $q_{O_2}$ , specific oxygen (O<sub>2</sub>) uptake rate. TN, total nitrogen. EPS, extracellular polysaccharides.



**Table S3** Elemental composition of cell protein produced in scenario III.

| $\mu$ (h <sup>-1</sup> ) | 0.050      | 0.063      | 0.076      | 0.089      | 0.102      |
|--------------------------|------------|------------|------------|------------|------------|
| C (%)                    | 45.21±0.56 | 45.51±0.22 | 45.60±0.39 | 45.37±0.12 | 45.42±0.12 |
| H (%)                    | 7.21±0.12  | 7.26±0.01  | 7.35±0.07  | 7.38±0.02  | 7.30±0.05  |
| O (%)                    | 30.74±2.01 | 30.26±0.11 | 29.40±0.89 | 29.15±0.38 | 28.96±0.42 |
| N (%)                    | 11.02±0.08 | 11.25±0.06 | 11.34±0.02 | 11.35±0.05 | 11.63±0.06 |
| S (%)                    | 0.65±0.10  | 0.59±0.07  | 0.59±0.02  | 0.56±0.00  | 0.56±0.02  |
| In total (%)             | 94.82      | 94.86      | 94.28      | 93.81      | 93.86      |
| Others (%)               | 5.18       | 5.14       | 5.72       | 6.19       | 6.14       |

**Note:**  $\mu$ , growth rate. C, carbon. H, hydrogen. O, oxygen. N, nitrogen. S, sulfur. Phosphorus could not be detected due to the limits of the elemental analyzer. Four replicates were assayed for each  $\mu$ , and the results (% w/w) were expressed as (average value)  $\pm$  (standard deviation).

**Table S4** Transcriptomic response to induction of oxygen deficiency.

| Pathway                                      | Name        | ID (KEGG)   | log <sub>2</sub> (fold-change) | P-value  | Regulation | Function                                        |
|----------------------------------------------|-------------|-------------|--------------------------------|----------|------------|-------------------------------------------------|
| <b>Methane assimilation</b>                  | <i>pmoB</i> | EQU24_19300 | 1.32                           | 1.20E-04 | Up         | Particulate methane monooxygenase alpha subunit |
|                                              | <i>pmoA</i> | EQU24_19305 | 1.53                           | 1.59E-04 | Up         | Particulate methane monooxygenase beta subunit  |
|                                              | <i>eno</i>  | EQU24_13315 | 1.02                           | 1.16E-03 | Up         | Phosphopyruvate hydratase                       |
| <b>Ribosome small subunit synthesis</b>      | <i>rpsL</i> | EQU24_03850 | 1.37                           | 4.42E-04 | Up         | 30S ribosomal protein S12                       |
|                                              | <i>rpsG</i> | EQU24_03855 | 1.11                           | 7.55E-03 | Up         | 30S ribosomal protein S7                        |
|                                              | <i>rpsK</i> | EQU24_03990 | 1.04                           | 2.30E-04 | Up         | 30S ribosomal protein S11                       |
|                                              | <i>rpsI</i> | EQU24_18070 | 1.30                           | 6.12E-03 | Up         | 30S ribosomal protein S9                        |
| <b>Ribosome large subunit synthesis</b>      | <i>rplJ</i> | EQU24_03830 | 1.56                           | 2.51E-04 | Up         | 50S ribosomal protein L10                       |
|                                              | <i>rplL</i> | EQU24_03835 | 1.12                           | 1.71E-03 | Up         | 50S ribosomal protein L7/L12                    |
|                                              | <i>rplM</i> | EQU24_18065 | 1.12                           | 2.67E-02 | Up         | 50S ribosomal protein L13                       |
| <b>Regulation of nitrogen transportation</b> | <i>nifA</i> | EQU24_17280 | 1.13                           | 5.50E-03 | Up         | <i>nif</i> -specific transcriptional activator  |
|                                              | <i>nifL</i> | EQU24_17275 | 1.38                           | 4.52E-02 | Up         | Nitrogen fixation negative regulator            |
|                                              | <i>glnK</i> | EQU24_07180 | 2.57                           | 1.51E-04 | Up         | P-II family nitrogen regulator                  |
|                                              | <i>glnL</i> | EQU24_07190 | 1.26                           | 5.14E-03 | Up         | Nitrogen regulation protein NR(II)              |
|                                              | <i>glnG</i> | EQU24_07195 | 1.76                           | 5.50E-05 | Up         | Nitrogen regulation protein NR(I)               |
| <b>Nitrogen assimilation</b>                 | <i>nrt</i>  | EQU24_08975 | 1.68                           | 4.50E-03 | Up         | MFS transporter                                 |
|                                              | n.a.        | EQU24_12620 | 3.02                           | 2.82E-04 | Up         | ABC transporter substrate-binding protein       |
|                                              | n.a.        | EQU24_12625 | 2.95                           | 3.40E-05 | Up         | ABC transporter permease                        |
|                                              | n.a.        | EQU24_12630 | 2.99                           | 2.64E-04 | Up         | Nitrate ABC transporter ATP-binding protein     |
|                                              | <i>amtA</i> | EQU24_07165 | 2.06                           | 1.33E-05 | Up         | Ammonium transporter                            |
|                                              | <i>amtB</i> | EQU24_07175 | 2.48                           | 2.27E-04 | Up         | Ammonium transporter                            |
|                                              | <i>nasA</i> | EQU24_12645 | 2.99                           | 3.59E-05 | Up         | Nitrate reductase                               |
|                                              | <i>nirB</i> | EQU24_08985 | 2.86                           | 7.86E-05 | Up         | Nitrite reductase large subunit                 |

|                                     |             |             |      |          |    |                                       |
|-------------------------------------|-------------|-------------|------|----------|----|---------------------------------------|
|                                     | <i>nirD</i> | EQU24_08990 | 2.63 | 9.53E-05 | Up | Nitrite reductase small subunit       |
|                                     | n.a.        | EQU24_12640 | 3.06 | 2.46E-04 | Up | FAD-dependent oxidoreductase          |
|                                     | <i>glnA</i> | EQU24_07185 | 1.48 | 4.13E-05 | Up | Glutamine synthetase                  |
| <b>Terpenoid backbone synthesis</b> | <i>ispA</i> | EQU24_15335 | 1.06 | 9.71E-03 | Up | (2E,6E)-farnesyl diphosphate synthase |

**Note:** pairwise comparison of scenario III (sampled at the steady state under dilution rate 0.07 h<sup>-1</sup>) relative to scenario II (sampled at 32 h) was performed (n=2). Differentially expressed genes (log<sub>2</sub>(fold-change) ≥1, *P*-value ≤0.05) corresponding to Fig. 4 B and C and Fig. S3C were listed above, including 27 up-regulated genes. **n.a.:** not applicable.
